# Supplementary material for: Improved cardiac filling facilitates the postprandial elevation of stroke volume inPython regius
Source: Oxford University Press journal article supplement (doi:10.1242/jeb.142729), 2016-01-01
Supplement: jeb142729supp.pdf [file jeb142729supp.pdf]

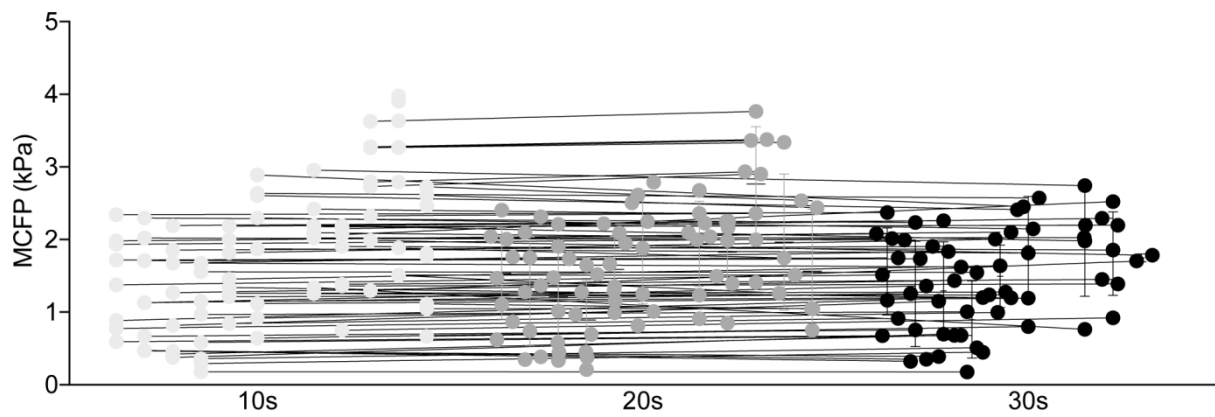

Fig. S1. Mean circulatory filling pressure (MCFP) of both fasted and fed snakes at the 8 different volume loading steps, measured 10, 20 and 30s after occlusion of the major outflow tracts. Significance was tested using a multiple t-test. The values are mean  $\pm$  SEM.

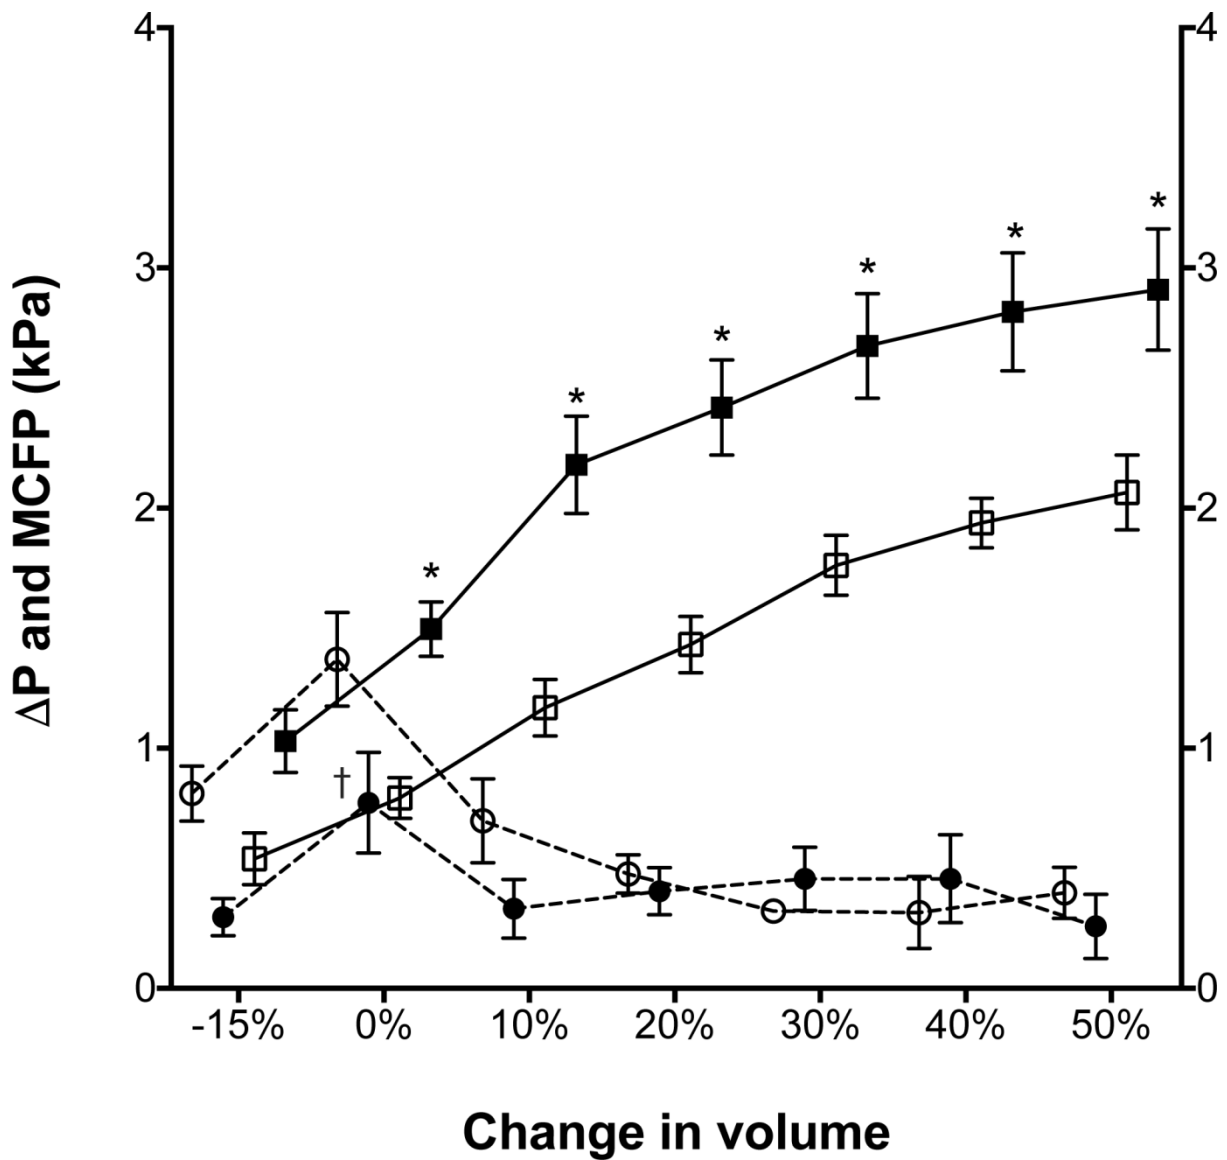

Fig. S2. The effects of volume loading on the venous and systemic pressure difference ( $\Delta P$ , circles) and mean circulatory filling pressure (MCFP, squares) in fasted pythons (white, N=5) and pythons fed a rodent meal equivalent to 20% of body mass (black, N=6) pythons. † represents  $\Delta P$  values statistically different between fasted and fed snakes \* denotes significant different MCFP between fasted and fed snakes. Evaluated by a two-way ANOVA followed by a Holm-Sidak multiple comparison test. All values are mean  $\pm$  SEM.
